# Supplementary material
Source: ML conference proceedings conference paper supplement (https://openaccess.thecvf.com/content/ICCV2023/html/Xu_Deformable_Model-Driven_Neural_ICCV_2023_paper.html)
Supplement: Supplementary file 2 [file Xu_Deformable_Model-Driven_Neural_ICCV_2023_supplemental.zip]

Archive with 2 entries (2 files):
- 06106-supp/supp.pdf
- 06106-supp/video.mp4
